# Supplementary material for: Manganese, nitrogen co-doped porous carbon with high-loading active sites as the oxygen reduction catalyst for Zn–air batteries
Source: Royal Society of Chemistry journal article supplement (doi:10.1039/d4se00771a), 2024-01-01
Supplement: d4se00771a1.pdf [file d4se00771a1.pdf]

## Supporting Information

### **Manganese, nitrogen co-doped porous carbon with high-loading active sites as the oxygen reduction catalyst for Zn-air battery**

Hao Xu<sup>a\*</sup>, Yuxuan Gao<sup>a</sup>, Ruopeng Li<sup>b\*</sup>, Weiyan Sun<sup>a</sup>, Xiangyu Lu<sup>b</sup>, Jie Bai<sup>a</sup>, Peixia Yang<sup>b</sup>

<sup>a</sup> College of Chemical Engineering, Inner Mongolia University of Technology, 010051 Hohhot, China

<sup>b</sup> School of Chemistry and Chemical Engineering, Harbin Institute of Technology, 150001 Harbin, China

\* Corresponding authors: Hao Xu ([xuhao@imut.edu.cn](mailto:xuhao@imut.edu.cn)); Ruopeng Li ([liruopeng630@163.com](mailto:liruopeng630@163.com));

## **Materials**

KOH (99.999 %), manganese acetylacetonate ( $\text{Mn}(\text{acac})_3$ , 97%) and 2-methylimidazole (2-MeIm, 98 %) were acquired from Shanghai Aladdin.  $\text{Zn}(\text{NO}_3)_2 \cdot 6\text{H}_2\text{O}$  (99 %) was acquired from Sinopharm. Nafion solution (5 %) was obtained from Dupont. Methanol (99.5 %) and isopropanol solution (99 %) were obtained from Tianjin Fuyu.

## **Electrochemical measurements**

All electrochemical measurements were conducted by standard three-electrode configuration controlled by an electrochemical workstation (CHI 760E) at room temperature. A glassy carbon rotating disk electrode with surface area of  $0.196 \text{ cm}^2$  served as working electrode. Graphite sheet and mercury/mercury oxide (Hg/HgO) were used as counter and reference electrodes, respectively, in 0.1 M KOH. To prepare catalyst ink, 2.5 mg of catalyst was dispersed into 500  $\mu\text{L}$  of a mixed solution containing 20  $\mu\text{L}$  of a Nafion solution, 300  $\mu\text{L}$  of a ultrapure water, and 180  $\mu\text{L}$  of an isopropanol solution, followed by ultrasonication for 60 min. All potentials have been converted to the reversible hydrogen electrode (RHE) potential.

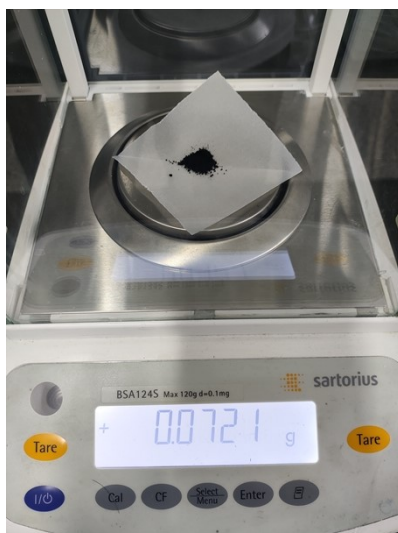

**Fig. S1.** The mass yield of Mn-N-C-900

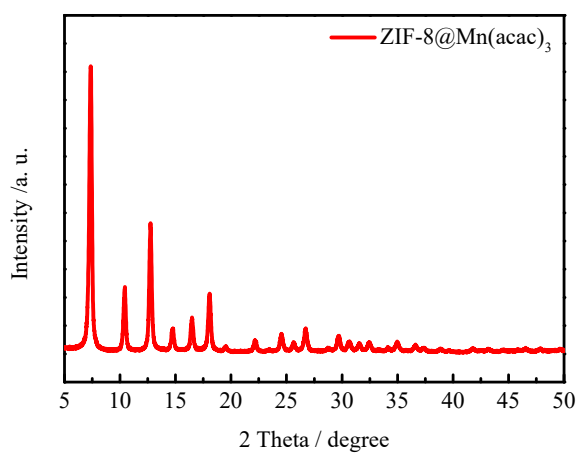

**Fig. S2.** XRD spectrum of ZIF-8@Mn(acac)<sub>3</sub>

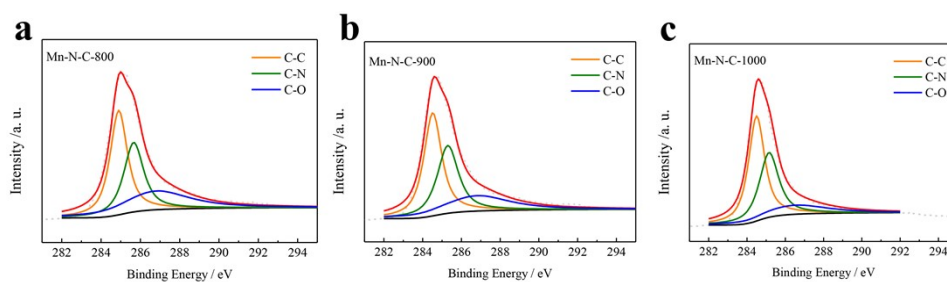

**Fig. S3.** C 1s XPS spectra of (a) Mn-N-C-800, (b) Mn-N-C-900 and (c) Mn-N-C-1000 catalysts.

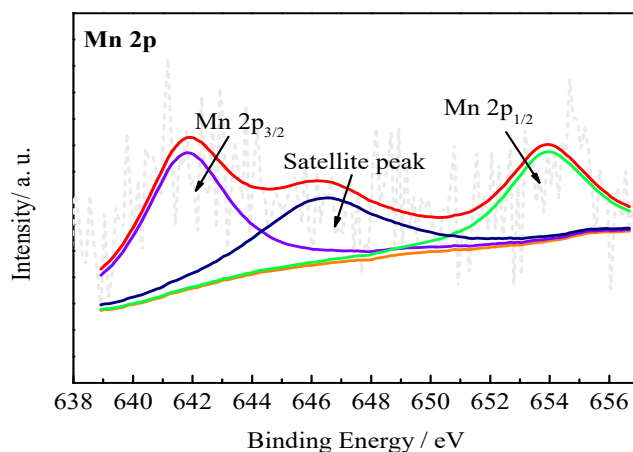

**Fig. S4.** Mn 2p XPS spectra of Mn-N-C-900 catalyst.

**Table S1** The percentage of different N-sites derived from high-resolution XPS scans of N 1s

| Sample      | Pyridinic-N (%) | Mn-N <sub>x</sub> (%) | Pyrrole N (%) | Graphitic-N (%) | Oxidized-N (%) |
|-------------|-----------------|-----------------------|---------------|-----------------|----------------|
| Mn-N-C-800  | 27.82           | 24.19                 | 12.97         | 20.73           | 14.29          |
| Mn-N-C-900  | 44.8            | 27.47                 | 12.72         | 4.63            | 10.38          |
| Mn-N-C-1000 | 25.31           | 16.97                 | 23.81         | 19.5            | 14.41          |

**Table S2** Comparison of the ORR performance of various M-N-C catalysts in alkaline environment from the recent literature and this work

| Catalysts              | Electrolyte      | Half-wave potential (V vs. RHE) | Reference                                     |
|------------------------|------------------|---------------------------------|-----------------------------------------------|
| <b>Mn-N-C-900</b>      | <b>0.1 M KOH</b> | <b>0.882</b>                    | <b>This work</b>                              |
| Fe-N-C HNSs            | 0.1 M KOH        | 0.84                            | Adv. Mater. 2019, 31, 1806312                 |
| Fe <sub>2</sub> N/NPCF | 0.1 M KOH        | 0.865                           | J. Colloid Interf. Sci. 2022, 616, 539-547.   |
| SA-Fe-NC               | 0.1 M KOH        | 0.88                            | Chem. Mater. 2021, 33, 5542-5554.             |
| Fe SA-NSC-900          | 0.1 M KOH        | 0.86                            | ACS Energy Lett. 2021, 6, 379-386.            |
| Mn-N-C                 | 0.1 M KOH        | 0.88                            | ACS Sustainable Chem. Eng. 2020, 8, 9367-9376 |

|              |           |       |                                     |
|--------------|-----------|-------|-------------------------------------|
| Co@hNCTs-800 | 0.1 M KOH | 0.887 | Nano Energy<br>2020, 71,<br>104592. |
|--------------|-----------|-------|-------------------------------------|
